# Supplementary material
Source: PubMed Central journal article supplement (PMC4121479)
Supplement: mmc1.pdf [file mmc1.pdf]

The American Journal of Human Genetics, Volume 94

Supplemental Data

**Neu-Laxova Syndrome, an Inborn Error  
of Serine Metabolism, Is Caused by Mutations in *PHGDH***

Ranad Shaheen, Zuhair Rahbeeni, Amal Alhashem, Eissa Faqeih, Qi Zhao, Yong Xiong,  
Agaadir Almoisheer, Sarah M. Al-Qattan, Halima A. Almadani, Noufa Al-Onazi, Badi S.  
Al-Baqawi, Mohammad Ali Saleh, and Fowzan S. Alkuraya

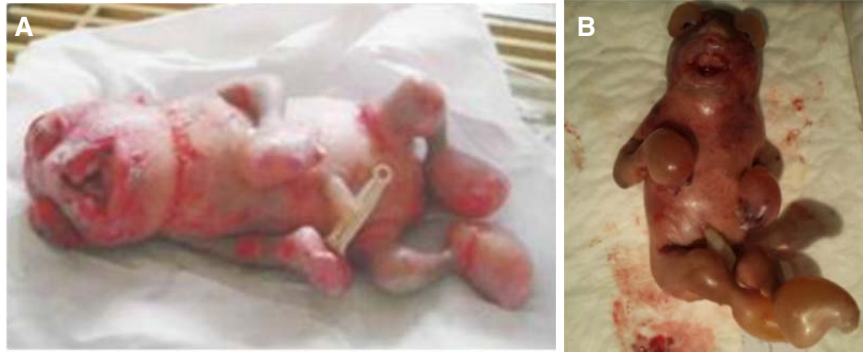

Figure S1. (A) Postnatal photograph of the index from Family 2 showing severe microcephaly, micrognathia, bulging eyes with absent eyelids, severe ichthyosis of the skin, a huge cleft lip and palate on the right side, flat nose, short neck, and generalized edema. Also seen are hypoplastic forearms and no discernible digits in the upper/lower limbs. (B) Postnatal photograph of the index from Family 2 showing massive body swelling with marked disfigurement of the face and limbs that appeared engulfed by a thin and shiny membrane.
